# Supplementary material
Source: Springer Nature journal article supplement (https://www.springermedizin.de/resource/supplementary/12967_2011_771_MOESM6_ESM.pdf/9577466)

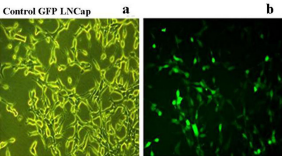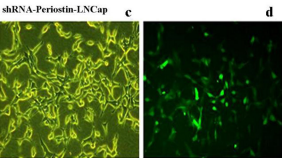

**A**

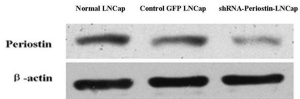

**a**

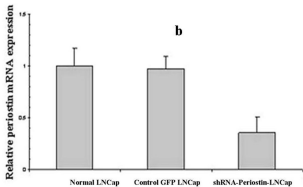

**B**

Supplement: MOESM6 [file 9577466]
